# Supplementary material for: Facile synthesis of mixed phase 1T/2H-MoS2 heterostructured nanosheets with a highly efficient solar light-driven photocatalyst and recyclable adsorbent
Source: Royal Society of Chemistry journal article supplement (doi:10.1039/d5cc01431j), 2025-01-01
Supplement: d5cc01431j1.pdf [file d5cc01431j1.pdf]

## Electronic Supplementary Information

### Facile Synthesis of Mixed Phase 1T/2H-MoS<sub>2</sub> Heterostructured Nanosheets with Highly Efficient Solar Light-Driven Photocatalyst and Recyclable Adsorbent

Sahil Thakur<sup>a</sup>, Ayush Badoni<sup>a</sup>, Samriti<sup>a,b</sup>, A. Savoyant<sup>c</sup>, Swart Hendrik Christoffel<sup>d</sup>, Mikhael Bechelany<sup>e,f</sup>, Andrej Kuznetsov<sup>b</sup>, Jai Prakash<sup>a\*</sup>

<sup>a</sup>Department of Chemistry, National Institute of Technology Hamirpur, Hamirpur (H.P.)-177005, India

<sup>b</sup>Department of Physics and Centre for Materials Science and Nanotechnology, University of Oslo, Oslo N-0316, Norway

<sup>c</sup>Aix-Marseille Université, CNRS, Université de Toulon, IM2NP (UM3 7334), Marseille, France.

<sup>d</sup>Department of Physics, University of the Free State (UFS), Bloemfontein, ZA 9300, South Africa

<sup>e</sup>Institut Européen des Membranes, IEM, UMR-5635, University Montpellier, ENSCM, CNRS, Place Eugene Bataillon, 34095 Montpellier, France

<sup>f</sup>Functional Materials Group, Gulf University for Science and Technology, Mubarak Al-Abdullah, 32093, Kuwait

#### \*Corresponding author:

Jai Prakash (Email: [jaip@nith.ac.in](mailto:jaip@nith.ac.in))

#### Table of Contents

1. Experimental Section
2. Lists of Figures and Tables
3. References

## 1. Experimental Section

### 1.1 Materials

Molybdenum trioxide ( $\text{MoO}_3$ ) (99%, Ottokemi), Thiourea ( $\text{SC}(\text{NH}_2)_2$ ) (99% Fisher Scientific), L-cysteine ( $\text{C}_3\text{H}_7\text{NO}_2\text{S}$ ) (98.5% Loba Chemicals), Thioacetamide ( $\text{C}_2\text{H}_5\text{NS}$ ) (98% Tokyo Chemical Industry) were used for the preparation of  $\text{MoS}_2$  samples.

### 1.2 Synthesis of $\text{MoS}_2$

The  $\text{MoS}_2$  samples were synthesized via a hydrothermal method using three distinct organic sulfur precursors, each with different sulfur ion release rates, as illustrated in **Scheme S1**. For each sample,  $\text{MoO}_3$  and the respective sulfur precursor (thioacetamide, L-cysteine, or thiourea) were weighed in stoichiometric ratios and dissolved in 70 mL of deionized water. The mixture was continuously stirred for 40 minutes to ensure proper dissolution and mixing. Subsequently, the solution was transferred to an 80 mL Teflon-lined stainless-steel autoclave and subjected to hydrothermal treatment at  $180^\circ\text{C}$  for 24 hours. After the reaction period, the autoclave was allowed to cool naturally to room temperature. The resulting black products were collected through filtration and purified by alternate washing with distilled water and ethanol. The washed products were then dried in an oven at  $60^\circ\text{C}$  for 10 hours. The final products were named as  $\text{MoS}_2$ -I,  $\text{MoS}_2$ -II, and  $\text{MoS}_2$ -III, corresponding to samples prepared using thioacetamide, L-cysteine, and thiourea as sulfur precursors, respectively.

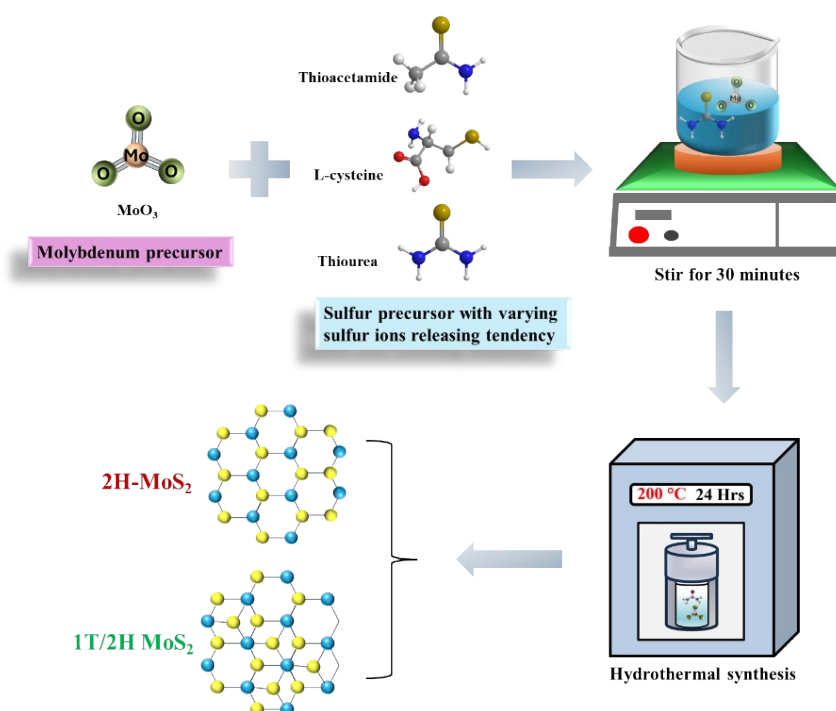

**Scheme S1.** Schematic illustration of the stepwise synthesis of  $\text{MoS}_2$  samples.

### 1.3 Characterization

The morphological features of MoS<sub>2</sub> samples were characterized using scanning electron microscopy (SEM, EVO18 Carl Zeiss) and high-resolution transmission electron microscopy (HRTEM, Philips CM100). X-ray photoelectron spectroscopy (XPS, PHI 5000 Versaprobe) was used to analyze elemental composition and chemical bonding states. Functional groups were identified using Fourier transform infrared spectroscopy (FTIR, PerkinElmer). Structural characterization was performed using Raman spectroscopy (WiTec, Ar-ion laser  $\lambda = 514$  nm) and X-ray diffraction (XRD, Cu K $\alpha$  radiation,  $\lambda = 0.15406$  nm). Surface area and porosity were measured by Brunauer-Emmett-Teller (BET) Autosorb iQ-x analysis under N<sub>2</sub> atmosphere. Thermal stability was evaluated using thermogravimetric analysis (TGA, EXSTAR SII 6300) from 32-700°C. Optical properties were analyzed using UV-visible spectroscopy (UH5300) and photoluminescence spectroscopy (Lambda 45 PerkinElmer at  $\lambda_{\text{ex}}$  532 nm). Electron spin resonance (ESR) was used for the analysis of paramagnetic properties. Electrochemical measurements were conducted using a Metrohm Autolab workstation with a three-electrode system (Pt counter electrode, Ag/AgCl reference electrode, and MoS<sub>2</sub>-modified carbon working electrode) in 0.1 M Na<sub>2</sub>SO<sub>4</sub> electrolyte.

### 1.4 Adsorption and Photocatalytic measurements

The photocatalytic experiment was conducted at ambient temperature ( $25 \pm 2^\circ\text{C}$ ) by dispersing 10 mg of the photocatalyst in 50 mL of MB solution (50  $\mu\text{M}$ ). The mixture was firstly stirred in dark environment for 30 minutes to achieve adsorption-desorption equilibrium, and then exposed to natural sunlight for 90 minutes. Aliquots were taken at specific intervals, filtered, and analysed using a UV-vis spectrophotometer. To assess catalyst stability, the used MoS<sub>2</sub> sample was recovered through centrifugation and dried overnight at 60°C. The recovered catalyst underwent five consecutive photocatalytic cycles under identical conditions to evaluate its reusability. For adsorption studies, various experimental parameters were systematically optimized, including catalyst dosage, contact time, initial dye concentration, and solution pH. The adsorption (% C<sub>ads</sub>) and photocatalytic degradation (% C<sub>deg</sub>) efficiency of the photocatalyst was calculated using the following equations:

$$\%C_{ads} = \frac{C_{in} - C_0}{C_{in}} \times 100$$

$$\%C_{deg} = \frac{C_0 - C_t}{C_0} \times 100$$

Where,  $C_{in}$ ,  $C_0$ , and  $C_t$  represent the concentrations of MB dye at the initial stage, after reaching adsorption–desorption equilibrium, and at time  $t$ , respectively.

Additionally, the photocatalytic mechanism was investigated through radical trapping experiments using specific scavengers: EDTA-2Na for holes ( $h^+$ ), benzoquinone (BQ) for superoxide radicals ( $\bullet O_2^-$ ),  $AgNO_3$  for electrons ( $e^-$ ) and isopropyl alcohol (IPA) for hydroxyl radicals ( $\bullet OH$ ). The radical trapping experiments were conducted following the same protocol as the degradation studies, with 1 mM of each scavenger added to the MB solution before introducing the catalyst.

## 2 Lists of Figures and Tables

### 2.1 TEM-EDS

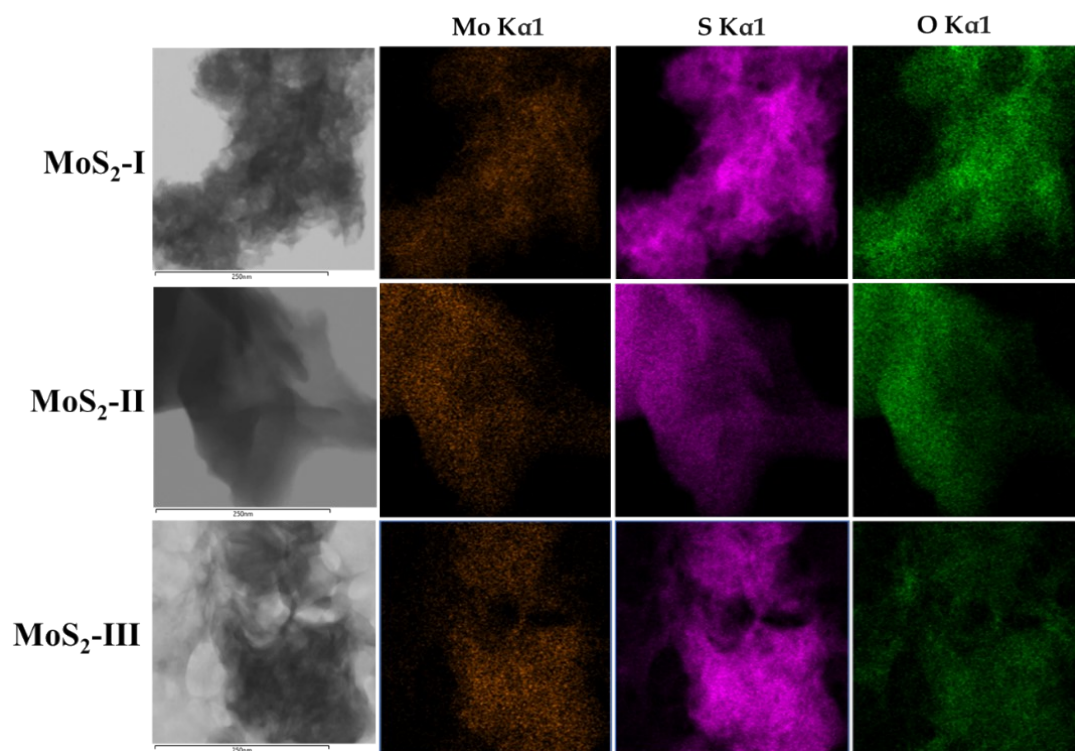

**Figure S1.** TEM-EDS mapping of MoS<sub>2</sub> samples.

## 2.2 XPS spectra

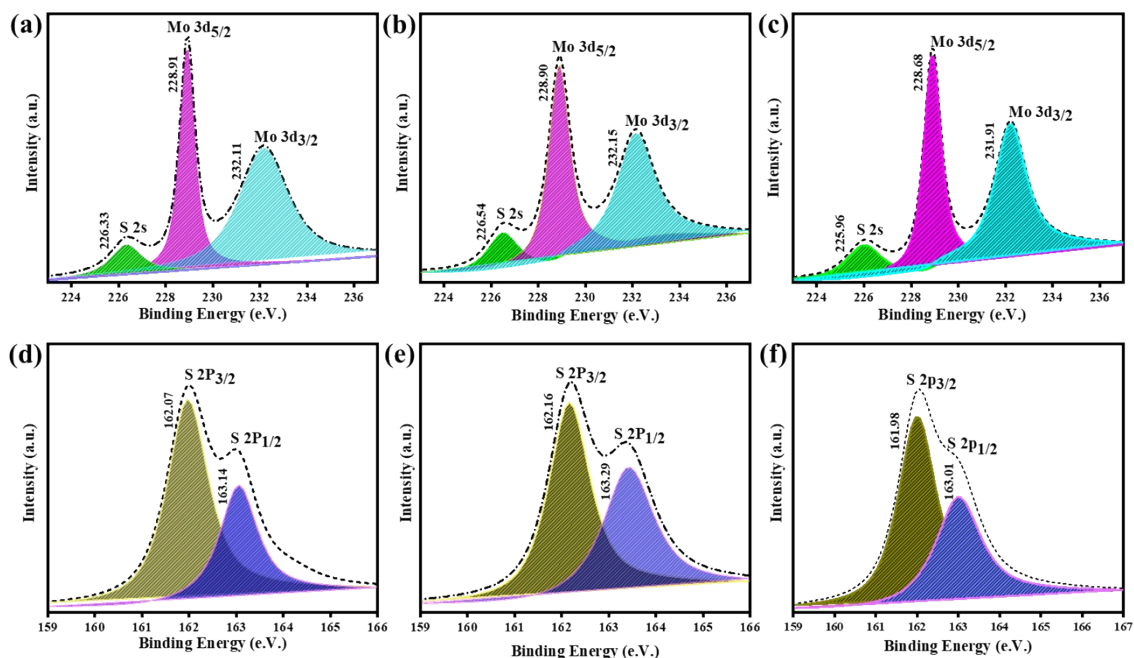

**Figure S2.** XPS spectra showing Mo 3d (a-c) and S 2p (d-f) regions for MoS<sub>2</sub>-I, MoS<sub>2</sub>-II, and MoS<sub>2</sub>-III, respectively.

The high-resolution XPS spectra of all MoS<sub>2</sub> samples showed characteristic peaks for both Mo and S.<sup>1</sup> as shown in **Figure S2(a-c)**. MoS<sub>2</sub>-I showed peaks at 228.91 and 232.11 eV, MoS<sub>2</sub>-II at 228.90 and 232.15 eV, and MoS<sub>2</sub>-III at 228.68 and 231.91 eV, corresponding to Mo<sup>4+</sup> 3d<sub>5/2</sub> and Mo<sup>4+</sup> 3d<sub>3/2</sub> states, respectively. The slight shift to lower binding energy observed in MoS<sub>2</sub>-III indicates the presence of mixed-phase MoS<sub>2</sub>, also consistent with reported binding energy difference of 0.5-0.9 eV between 2H and 1T phases.<sup>2,3</sup> Additional S 2s peaks were observed at 226.33 eV (MoS<sub>2</sub>-I), 226.54 eV (MoS<sub>2</sub>-II), and 225.96 eV (MoS<sub>2</sub>-III). The S 2p spectra exhibited two main peaks corresponding to S 2p<sub>3/2</sub> and S 2p<sub>1/2</sub> orbitals, shown in **Figure S2(d-f)**. These peaks were observed at 161.965 and 163.04 eV for MoS<sub>2</sub>-I, 162.16 and 163.29 eV for MoS<sub>2</sub>-II, and 161.88 and 163.01 eV for MoS<sub>2</sub>-III, aligning closely with previous studies.<sup>4</sup> Thus, these spectral features indicate the formation of pure 2H phase in both MoS<sub>2</sub>-I and MoS<sub>2</sub>-II samples and a mixed 1T/2H phase in MoS<sub>2</sub>-III.

## 2.3 FTIR Spectra

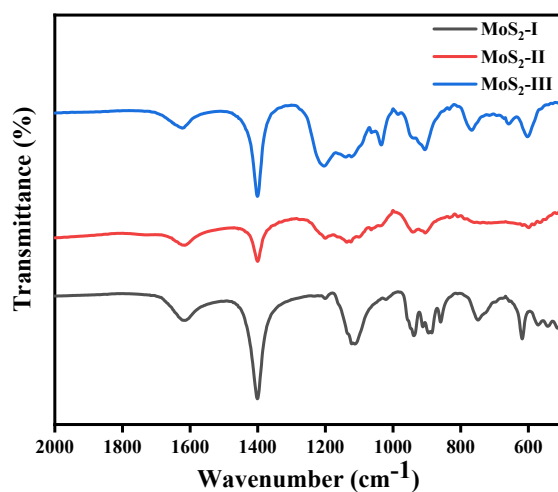

Figure S3. FTIR spectra of MoS<sub>2</sub> samples.

## 2.4 BET and TGA

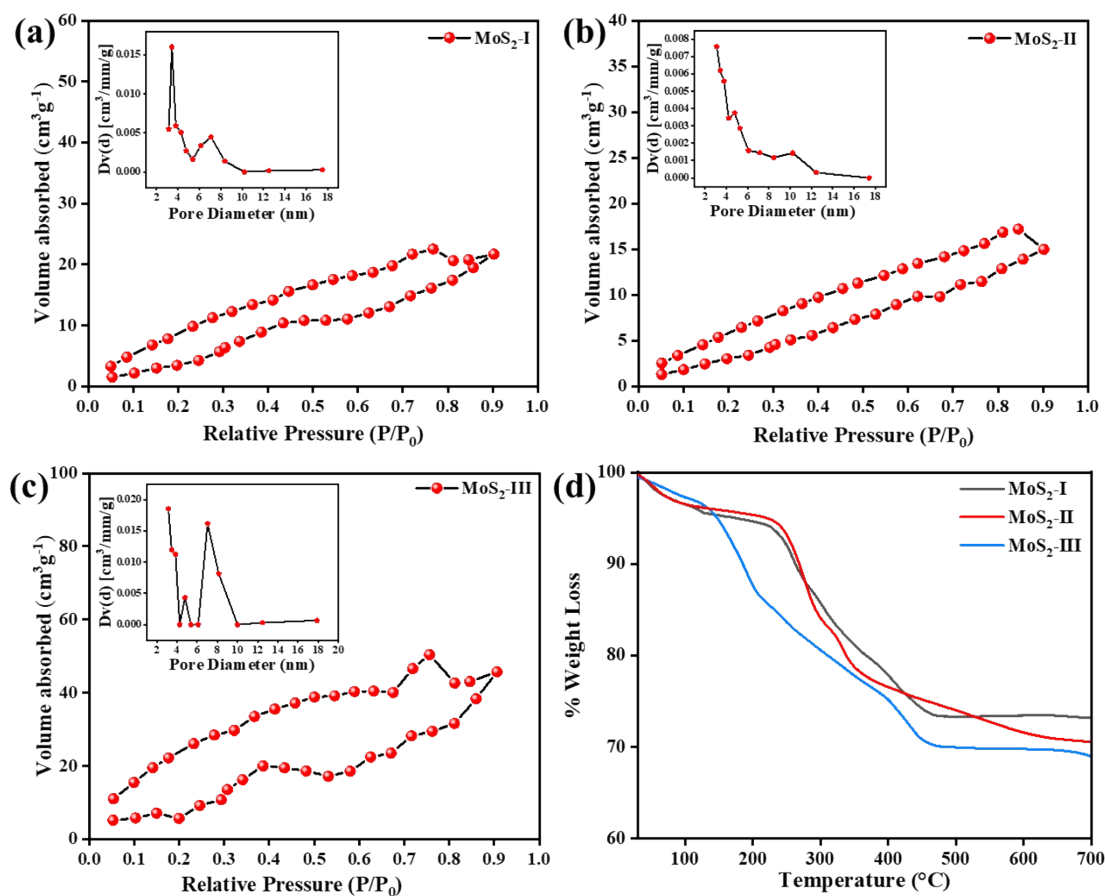

**Figure.S4 (a-c)** N<sub>2</sub> adsorption-desorption isotherms with BJH pore size distribution (shown in inset) of MoS<sub>2</sub> samples. **(d)** Thermal decomposition profiles obtained from TGA analysis of MoS<sub>2</sub> samples.

The specific surface area and porosity of MoS<sub>2</sub> samples were examined using the N<sub>2</sub> adsorption-desorption method, which revealed a type IV isotherm pattern with H3 hysteresis loop (**Figure S4(a-c)**) indicating a mesoporous structure originated from the interstitial spaces created by the interconnected network of MoS<sub>2</sub> nanosheets. Using the multipoint BET method, the specific surface areas were determined to be 26.1, 17.5, and 40.5 m<sup>2</sup>/g for MoS<sub>2</sub>-I, MoS<sub>2</sub>-II, and MoS<sub>2</sub>-III samples, respectively. The corresponding pore size distribution, calculated from the desorption branch of the nitrogen isotherm (**Figure S4(a-c), inset**), showed a relatively broad range of mesopores. This relatively large surface area and porosity (listed in **Table S1**) can provide more active sites for the adsorption of pollutant molecules, which is beneficial for the rapid adsorption and transfer of adsorbates within the hierarchically porous structure. The TGA curves for MoS<sub>2</sub> samples revealed distinct weight loss patterns across the temperature range up to 700°C, as shown in **Figure S4(d)**. The initial weight loss up to 120°C, was corresponding to the evaporation of surface-adsorbed water molecules. The weight loss observed near 300°C, attributed to the oxidation of MoS<sub>2</sub> to MoO<sub>3</sub> and the decomposition of residual precursor materials.<sup>5</sup> The total thermal decomposition process resulted in total weight losses of 26.94%, 29.32%, and 31.03% for MoS<sub>2</sub>-I, MoS<sub>2</sub>-II, and MoS<sub>2</sub>-III samples, respectively. These moderate weight loss values across the elevated temperature range demonstrate the robust thermal stability of all synthesized MoS<sub>2</sub> samples.

**Table S1.** Surface area and Pore characteristics of MoS<sub>2</sub> samples determined by BET analysis.

| Sample                | Surface area (m <sup>2</sup> g <sup>-1</sup> ) | Pore size (nm) | Pore volume (cm <sup>3</sup> g <sup>-1</sup> ) |
|-----------------------|------------------------------------------------|----------------|------------------------------------------------|
| MoS <sub>2</sub> -I   | 26.1                                           | 3.4            | 0.03                                           |
| MoS <sub>2</sub> -II  | 17.5                                           | 3.1            | 0.02                                           |
| MoS <sub>2</sub> -III | 40.5                                           | 3.2            | 0.05                                           |



## 2.5 Tauc plots

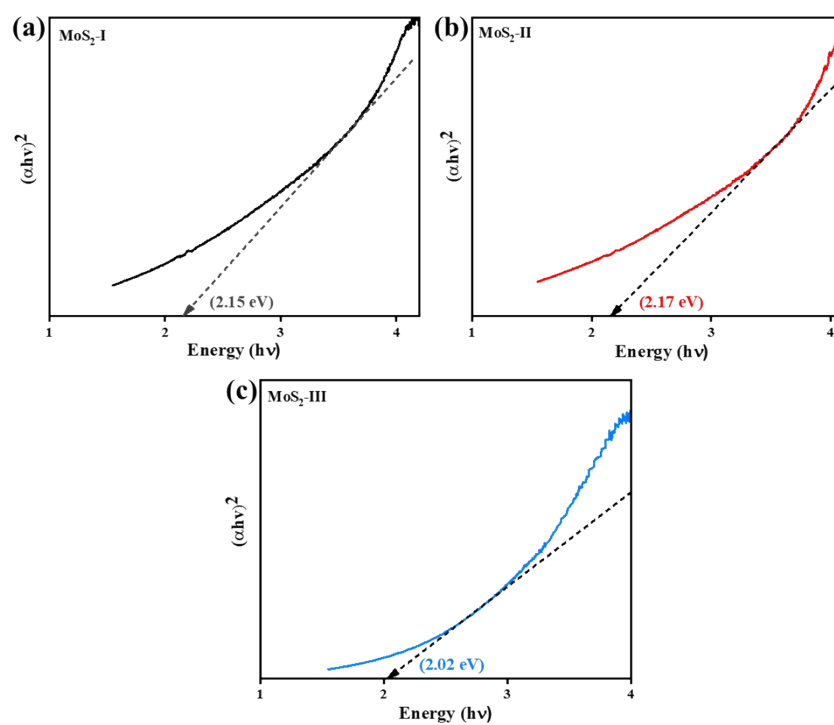

**Figure S5.** Tauc plots of MoS<sub>2</sub> samples.

Bandgap analysis using Tauc plots revealed varying energy gaps among the synthesized samples: 2.15 eV for MoS<sub>2</sub>-I, 2.17 eV for MoS<sub>2</sub>-II, and 2.02 eV for MoS<sub>2</sub>-III. The notably lower bandgap observed in MoS<sub>2</sub>-III can be attributed to the incorporation of the 1T phase within its structure.

## 2.6 Photocatalytic Degradation of MB dye by MoS<sub>2</sub> Photocatalysts across three experimental batches

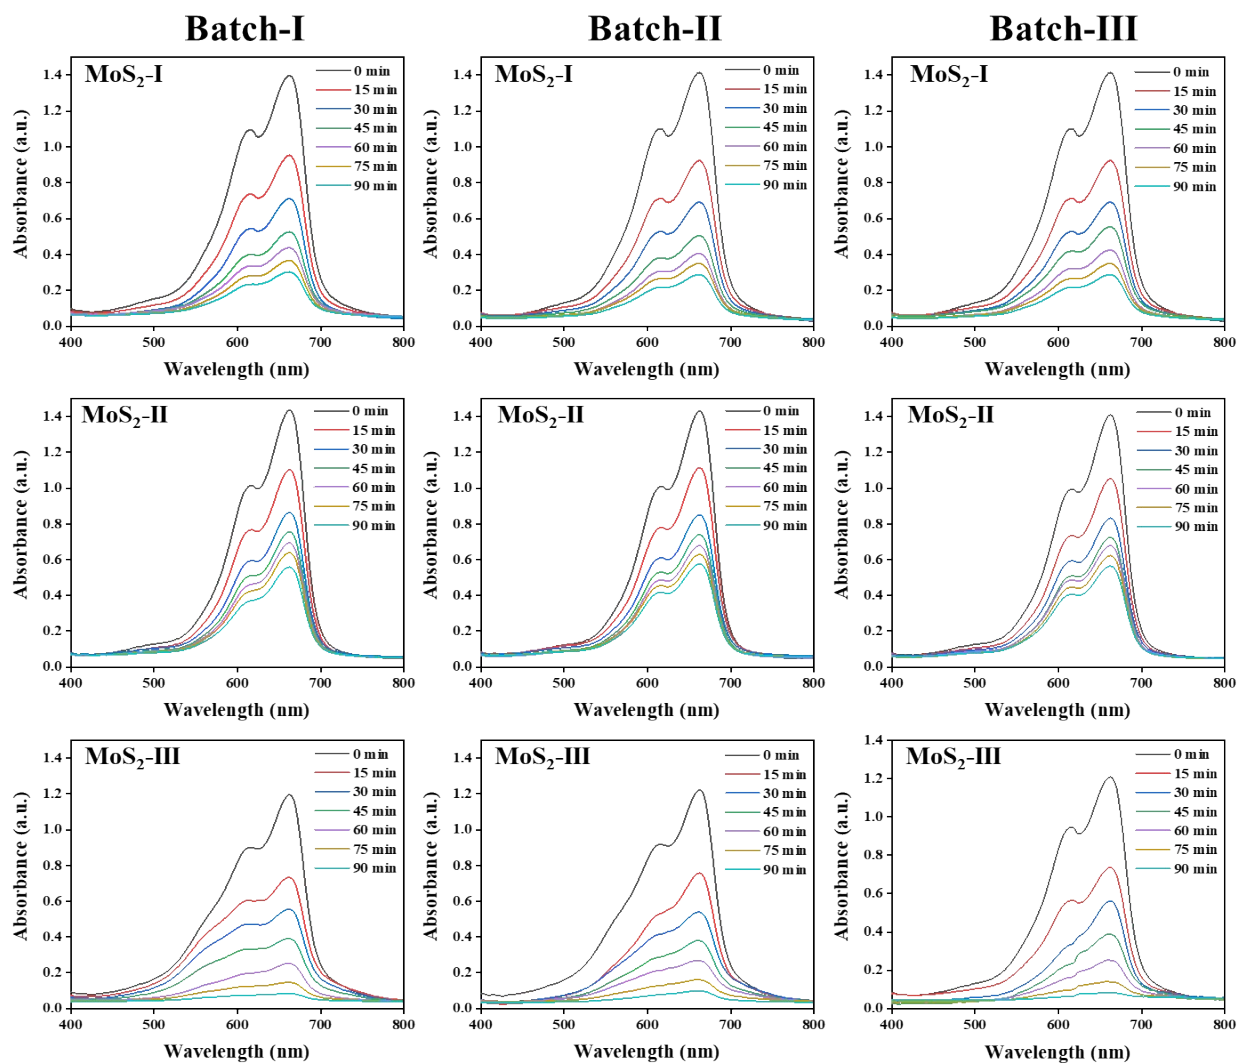

**Figure S6.** UV-visible absorption spectra showing the photocatalytic degradation of MB dye using MoS<sub>2</sub>-I, MoS<sub>2</sub>-II, and MoS<sub>2</sub>-III across three experimental batches.

## 2.7 Calibration curve for MB dye

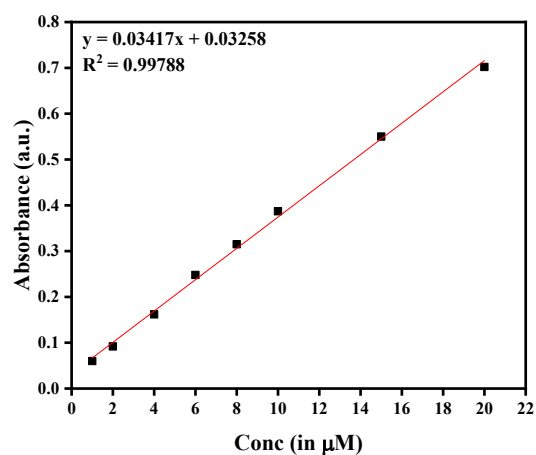

**Figure S7.** Standard curve for MB dye demonstrates various dye concentrations, including the equation and R-squared value.

## 2.8 Effect of various parameters on adsorption capacity of MoS<sub>2</sub>-III

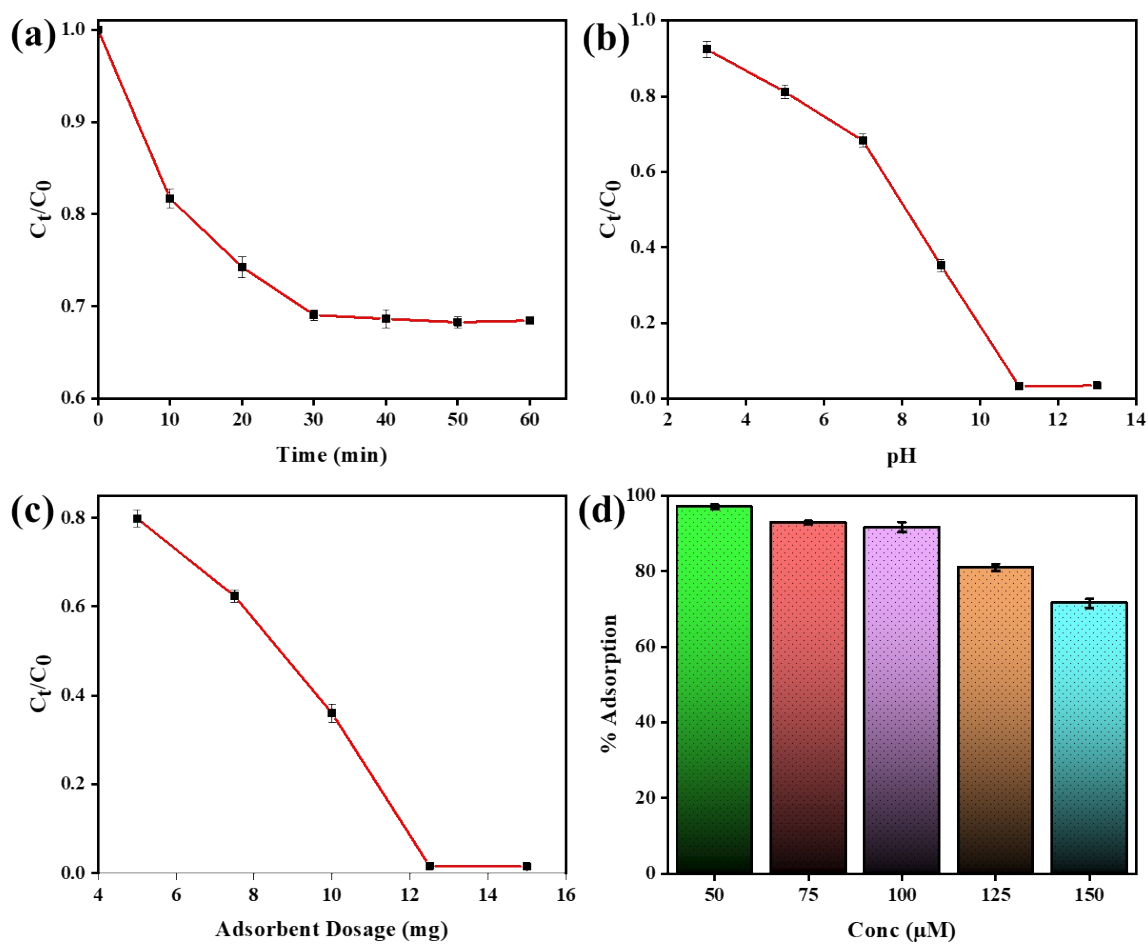

**Figure S8.** Adsorption performance of MoS<sub>2</sub>-III for MB dye removal: effect of (a) contact time, (b) solution pH, (c) adsorbent dosage, and (d) initial dye concentration.

**Effect of contact time.** The adsorption behaviour was studied using 10 mg MoS<sub>2</sub>-III with 50 ml of 50  $\mu$ M MB solution over 60 minutes. As shown in **Figure S8(a)**, the adsorption capacity showed rapid initial increase due to abundant active sites, gradually reaching equilibrium at 30 minutes. This efficient adsorption suggests MoS<sub>2</sub> as high-performance adsorbent due to its electrostatic attraction and  $\pi$ - $\pi$  stacking interactions with MB molecules.<sup>6</sup>

**Effect of pH.** The pH-dependent adsorption behaviour of MoS<sub>2</sub>-III was investigated at pH values ranging from 3 to 13 at room temperature for 30 minutes. The results, illustrated in **Figure S8(b)**, revealed a strong correlation between pH and removal efficiency, with the adsorption rate dramatically improving under basic conditions. Specifically, the removal efficiency increased more than tenfold, from 9% at pH 3 to 97% at pH 11. This behaviour is consistent with the cationic nature of MB dye, which favours basic environments.<sup>7</sup> At lower pH, H<sup>+</sup> ions compete with dye molecules for adsorption sites, while higher pH increases surface charge density, enhancing electrostatic attractions between dye and MoS<sub>2</sub> surface.<sup>6</sup>

**Effect of adsorbent dosage.** MoS<sub>2</sub>-III dosage was varied from 5-15 mg at constant MB concentration (shown in **Figure S8(c)**). Higher adsorbent amounts improved MB removal efficiency due to increased adsorption sites. However, beyond 12.5 mg, the removal efficiency of MB in the solution by the adsorbent did not substantially increase, indicating underutilization of active sites at higher dosages.<sup>8</sup>

**Effect of initial dye concentration.** The concentration dependence adsorption behaviour was examined using 50 mL MB solutions ranging from 50 to 150  $\mu$ M with 12.5 mg MoS<sub>2</sub> at pH 11 for the optimal contact time of 30 minutes. **Figure S8(d)** shows that the removal efficiency decreased from  $95.8 \pm 0.8$  % to  $69.9 \pm 1.7$  % as initial concentration increased from 50 to 150  $\mu$ M. This inverse relationship between removal efficiency and initial concentration indicates a finite number of active sites available on the MoS<sub>2</sub> surface for dye adsorption.

**Table S2.** Adsorption isotherm models along with their linear equations used in the present study.

| Isotherm Model | Plot                    | Linear Equation                                     | References |
|----------------|-------------------------|-----------------------------------------------------|------------|
| Langmuir       | $C_e/q_e$ vs. $C_e$     | $\frac{C_e}{q} = \frac{1}{Q_m b} + \frac{C_e}{Q_m}$ | 9          |
| Freundlich     | $\ln q_e$ vs. $\ln C_e$ | $\ln q = \frac{\ln C_e}{n} + \ln K_f$               | 10         |
| Temkin         | $q_e$ vs. $\ln C_e$     | $q = B \ln K_t + B \ln C_e$                         | 11         |

In these isotherm models,  $q$  represents the equilibrium adsorption capacity,  $C_e$  is the equilibrium concentration,  $b$  is the Langmuir constant and  $Q_m$  denotes the maximum adsorption capacity. For the Freundlich model,  $K_f$  and  $1/n$  represent the adsorption capacity and intensity constants, respectively. In the Temkin model,  $B$  and  $K_t$  are Temkin constants.

## 2.9 Adsorption isotherm plots

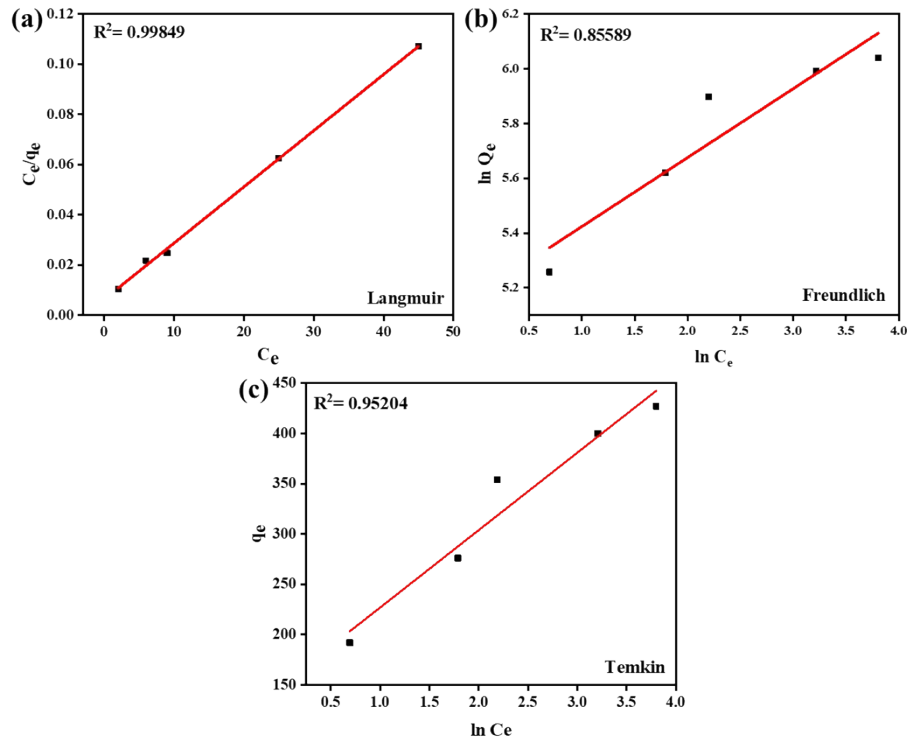

**Figure S9.** Adsorption isotherms of MoS<sub>2</sub>-III fitted to (a) Langmuir, (b) Freundlich, and (c) Temkin isotherm.

**Table S3.** Comparison between MoS<sub>2</sub> and other adsorbents used for the adsorption of MB dye.

| Adsorbent                             | Q <sub>m</sub> | Ref                  |
|---------------------------------------|----------------|----------------------|
| MoS <sub>2</sub> nanostructure        | 208 mg/g       | <sup>7</sup>         |
| MoS <sub>2</sub> nanoflowers          | 200 mg/g       | <sup>12</sup>        |
| MoS <sub>2</sub> nanosheet            | 95.31 mg/g     | <sup>13</sup>        |
| MoS <sub>2</sub> ultrathin nanosheets | 146.43 mg/g    | <sup>6</sup>         |
| MoS <sub>2</sub> nanosheet            | 297 mg/g       | <sup>14</sup>        |
| Graphene oxide                        | 454.54 mg/g    | <sup>8</sup>         |
| Mesoporous activated carbon           | 364.2 mg/g     | <sup>15</sup>        |
| ZnCl <sub>2</sub> -activated carbon   | 156.25 mg/g    | <sup>16</sup>        |
| Mesoporous activated carbon           | 195.2 mg/g     | <sup>17</sup>        |
| MoS <sub>2</sub> nanosheets           | 446.42 mg/g    | <b>Present study</b> |

## 2.10 Kinetics of MB dye degradation

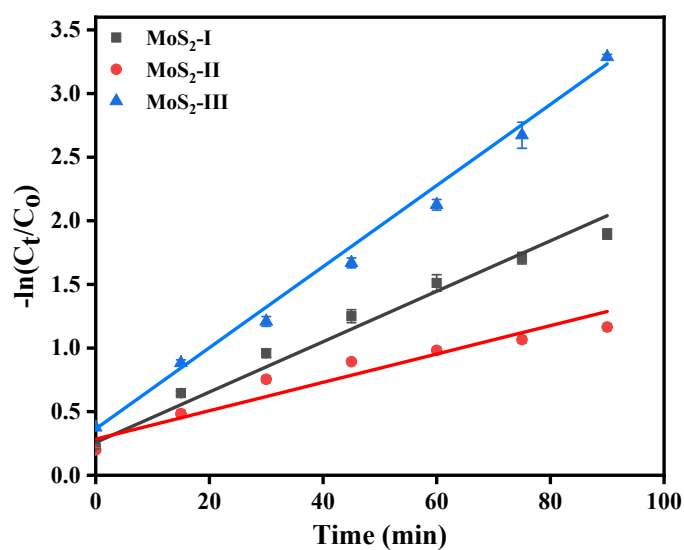

**Figure S10.** Pseudo-first-order kinetics plots of MoS<sub>2</sub> samples.

**Table S4.** Comparing the MB dye degradation performance of prepared MoS<sub>2</sub> samples with similar 2D photocatalysts

| Photocatalyst                                         | Catalyst dosage (mg.L <sup>-1</sup> ) | MB concentration (μM) | Light source | Time (in min) | Removal efficiency (%) | Ref              |
|-------------------------------------------------------|---------------------------------------|-----------------------|--------------|---------------|------------------------|------------------|
| GO                                                    | 200                                   | 50                    | Sunlight     | 120           | 99                     | <sup>8</sup>     |
| GO                                                    | 200                                   | 20                    | Sunlight     | 120           | 91                     | <sup>18</sup>    |
| rGO                                                   | 400                                   | 45                    | Visible      | 100           | 66                     | <sup>19</sup>    |
| Water soluble Graphene                                | 200                                   | 50                    | Visible      | 90            | 96%                    | <sup>20</sup>    |
| MoS <sub>2</sub>                                      | 200                                   | 60                    | Visible      | 120           | 98                     | <sup>21</sup>    |
| 1T/2H-MoS <sub>2</sub>                                | 100                                   | 15                    | Visible      | 180           | 80                     | <sup>22</sup>    |
| Ti <sub>3</sub> C <sub>2</sub> T <sub>x</sub> (MXene) | 100                                   | 31                    | Sunlight     | 120           | 10                     | <sup>23</sup>    |
| MoS <sub>2</sub> -rGO                                 | 1000                                  | 188                   | Visible      | 60            | 99%                    | <sup>24</sup>    |
| MoS <sub>2</sub> -III                                 | 200                                   | 50                    | Sunlight     | 90            | 97.84%                 | <b>This work</b> |

## 2.11 Recyclability study

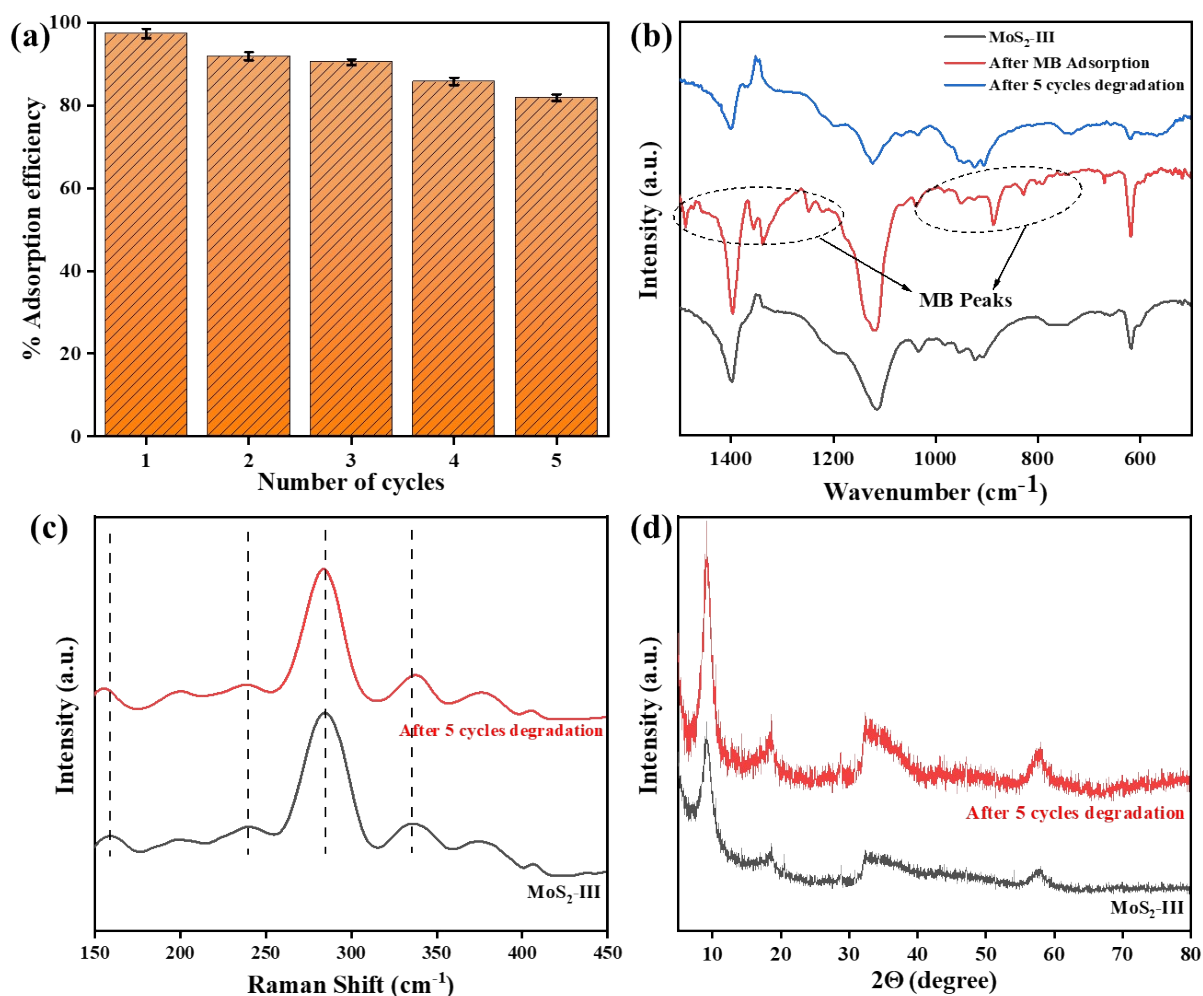

**Figure S11.** (a) Dye removal efficiency of MoS<sub>2</sub>-III after recovery. (b) FTIR spectra after adsorption and photodegradation of MB by MoS<sub>2</sub>-III. (c) Raman spectra and (d) XRD patterns of pristine MoS<sub>2</sub>-III and the photocatalyst obtained after 5 degradation cycles.

The appearance of additional peaks in the FTIR spectra (e.g., 1489 cm<sup>-1</sup> for C=C side ring stretching, 1330-1360 cm<sup>-1</sup> for -CH<sub>2</sub> or -CH<sub>3</sub> stretching, 1250 cm<sup>-1</sup> for -C-N, 1048 cm<sup>-1</sup> for C-S-C, 881 and 824 cm<sup>-1</sup> for C-H out of plane bending etc. of MoS<sub>2</sub>-III sample after the adsorption of MB dye confirms the stacking of dye molecules onto the surface of MoS<sub>2</sub>.<sup>25</sup>



### 3. References

- 1 Z. Wu, D. Wang and A. Sun, *J Mater Sci*, 2010, **45**, 182–187.
- 2 Y. Qi, Q. Xu, Y. Wang, B. Yan, Y. Ren and Z. Chen, *ACS Nano*, 2016, **10**, 2903–2909.
- 3 S. Shi, Z. Sun and Y. H. Hu, *Journal of Materials Chemistry A*, 2018, **6**, 23932–23977.
- 4 R. Zhang, Y. Li, J. Qi and D. Gao, *Nanoscale Res Lett*, 2014, **9**, 586.
- 5 A. Bahuguna, S. Kumar, V. Sharma, K. L. Reddy, K. Bhattacharyya, P. C. Ravikumar and V. Krishnan, *ACS Sustainable Chem. Eng.*, 2017, **5**, 8551–8567.
- 6 X.-Q. Qiao, F.-C. Hu, F.-Y. Tian, D.-F. Hou and D.-S. Li, *Rsc Advances*, 2016, **6**, 11631–11636.
- 7 S. Han, K. Liu, L. Hu, F. Teng, P. Yu and Y. Zhu, *Sci Rep*, 2017, **7**, 43599.
- 8 S. Thakur, A. Badoni, Samriti, P. Sharma, A. Ojha, H. C. Swart, A. Y. Kuznetsov and J. Prakash, *Langmuir*, 2024, **40**, 18486–18502.
- 9 I. Langmuir, *J. Am. Chem. Soc.*, 1918, **40**, 1361–1403.
- 10 H. Freundlich, *Zeitschrift für Physikalische Chemie*, 1907, **57U**, 385–470.
- 11 M. Vadi, A. O. Mansoorabad, M. Mohammadi and N. Rostami, *Asian Journal of Chemistry*, 2013, **25**, 5467.
- 12 X. Wang, P. Zhang, F. Xu, B. Sun, G. Hong and L. Bao, *Sustainability*, 2022, **14**, 7585.
- 13 C. Zhang, X. Li, C. Lian, C. Hu, S. Duo and Q. Hu, *Journal of Nanoscience and Nanotechnology*, 2018, **18**, 7948–7951.
- 14 A. T. Massey, R. Gusain, S. Kumari and O. P. Khatr, *Ind. Eng. Chem. Res.*, 2016, **55**, 7124–7131.
- 15 A. S. Abdulhameed, N. N. M. Firdaus Hum, S. Rangabhashiyam, A. H. Jawad, L. D. Wilson, Z. M. Yaseen, A. A. Al-Kahtani and Z. A. ALOthman, *Journal of Environmental Chemical Engineering*, 2021, **9**, 105530.
- 16 H. K. Yağmur and İ. Kaya, *Journal of Molecular Structure*, 2021, **1232**, 130071.
- 17 A. H. Jawad, A. Saud Abdulhameed, L. D. Wilson, S. S. A. Syed-Hassan, Z. A. ALOthman and M. Rizwan Khan, *Chinese Journal of Chemical Engineering*, 2021, **32**, 281–290.
- 18 Samriti, S. Thakur, A. Ojha, R. Gupta, M. Bechelany, A. Yu. Kuznetsov, H. C. Swart and J. Prakash, *Physica Status Solidi (a)*, 2024, 2400169.
- 19 A. Negash, S. Mohammed, H. D. Weldekirstos, A. D. Ambaye and M. Gashu, *Scientific Reports*, 2023, **13**, 22234.
- 20 A. Singh, P. Khare, S. Verma, A. Bhati, A. K. Sonker, K. M. Tripathi and S. K. Sonkar, *ACS Sustainable Chem. Eng.*, 2017, **5**, 8860–8869.
- 21 M. T. Leng Lai, K. Mun Lee, T. C. Kuang Yang, G. Ting Pan, C. Wei Lai, C.-Y. Chen, M. Rafie Johan and J. Ching Juan, *Nanoscale Advances*, 2021, **3**, 1106–1120.
- 22 D. Mouloua, M. Lejeune, N. S. Rajput, K. Kaja, M. El Marssi, M. A. El Khakani and M. Jouiad, *Ultrasonics Sonochemistry*, 2023, **95**, 106381.
- 23 Z. Othman, A. Sinopoli, H. R. Mackey and K. A. Mahmoud, *ACS Omega*, 2021, **6**, 33325–33338.
- 24 J. Li, X. Liu, L. Pan, W. Qin, T. Chen and Z. Sun, *RSC Adv.*, 2014, **4**, 9647–9651.
- 25 A. Gopalakrishnan, S. P. Singh and S. Badhulika, *New Journal of Chemistry*, 2020, **44**, 5489–5500.
